# Supplementary material
Source: publisher figshare collection journal article supplement (https://sage.figshare.com/ndownloader/files/24078944)
Supplement: Supplementary file 1 [file 24078944]

## Do (Microtargeted) Deepfakes Have Real Effects on Political Attitudes?

### Supplementary Information file

Table A1

*Means (SD) for attitude toward the politician as a function of exposure to the stimulus and a moderating variable (microtargeting/motivated reasoning)*

| <i>Attitude politician</i>                 |             |                |      |      |
|--------------------------------------------|-------------|----------------|------|------|
| <i>Moderator</i>                           | M_exp (SD)  | M_control (SD) | t    | p    |
| None (H1a)                                 | 4.31 (1.10) | 4.62 (.96)     | 2.48 | .01  |
| Religious light                            | 4.31 (.78)  | 4.38 (.78)     | .26  | .40  |
| Religious heavy                            | 4.57 (.93)  | 4.75 (.97)     | .87  | .19  |
| Voted CDA (yes) (RQ)                       | 4.89 (.97)  | 4.95 (.85)     | .25  | .40  |
| Voted CDA (no) (RQ)                        | 4.12 (1.09) | 4.54 (.97)     | 3.05 | .001 |
| Voted CDA (yes) *<br>Religious heavy (H1c) | 4.72 (1.04) | 5.43 (.77)     | 1.84 | .04  |

Table A2

*Means (SD) for attitude toward the political party as a function of exposure to the stimulus and a moderating variable (microtargeting/motivated reasoning)*

| <i>Attitude party</i>                      |             |                |        |     |
|--------------------------------------------|-------------|----------------|--------|-----|
| <i>Moderator</i>                           | M_exp (SD)  | M_control (SD) | t      | p   |
| None (H1b)                                 | 4.46 (2.26) | 4.76 (2.38)    | 1.08   | .14 |
| Religious light                            | 4.63 (2.27) | 4.56 (2.42)    | -.11   | .54 |
| Religious heavy                            | 5.27 (1.48) | 5.53 (2.26)    | .60    | .27 |
| Voted CDA (yes) (RQ)                       | 6.28 (1.54) | 6.63 (1.44)    | .88    | .19 |
| Voted CDA (no) (RQ)                        | 3.84 (2.14) | 4.35 (2.35)    | 1.66   | .05 |
| Voted CDA (yes) *<br>Religious heavy (H1c) | 6.07 (.92)  | 7.30 (1.64)    | 2.35** | .01 |
